# Supplementary material
Source: MDPI journal article supplement (https://www.mdpi.com/2072-4292/13/21/4419)
Supplement: s1 [file s1]

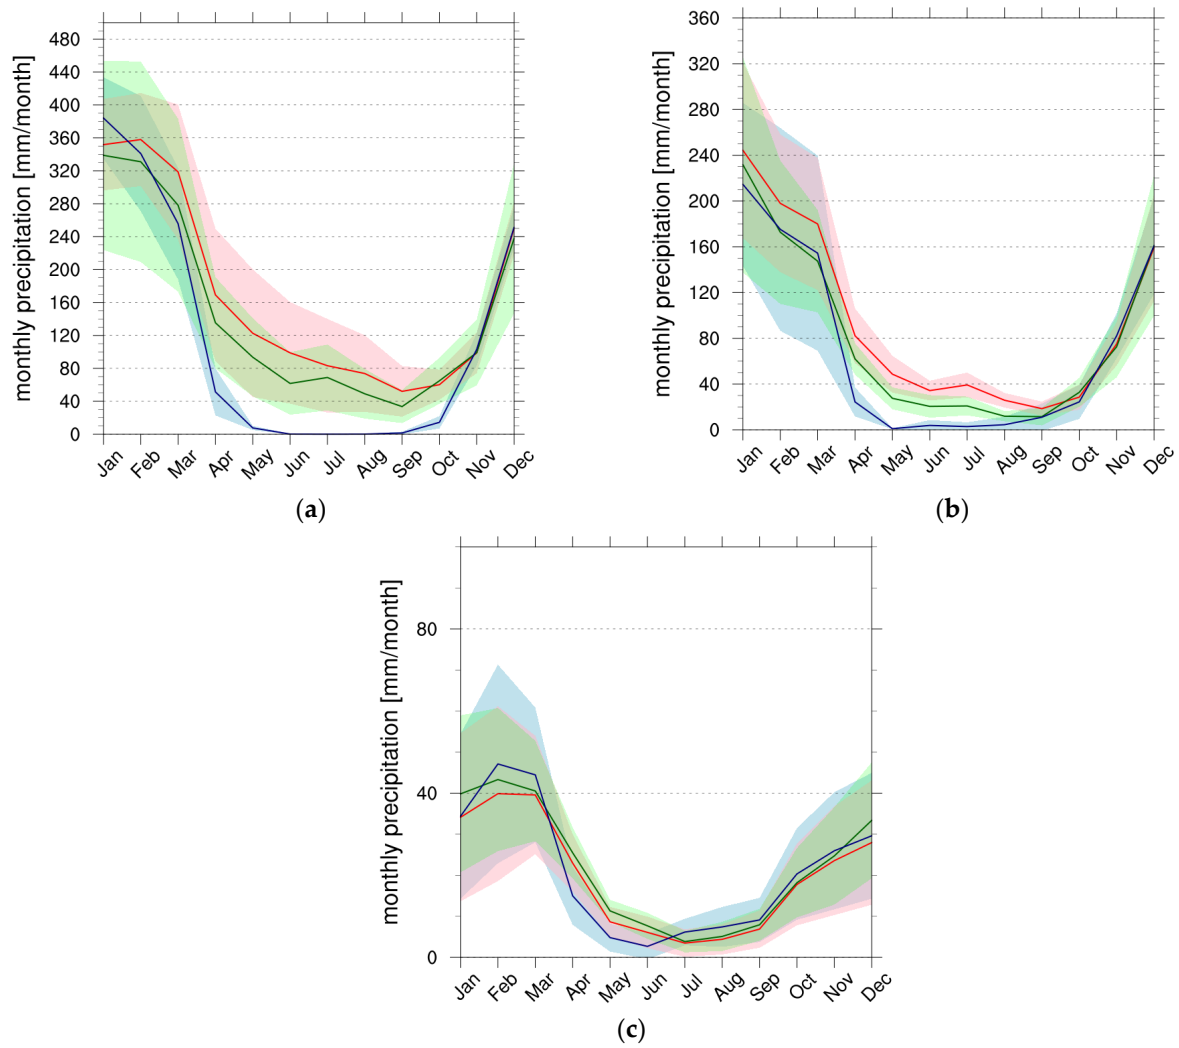

**Figure S1.** SA precipitation annual cycles from different zones composing cluster 5: eastern coast of Madagascar (a), coastal Mozambique (b), and central RSA (c).
